# Supplementary material for: Quantifying the contribution of Plasmodium falciparum malaria to febrile illness amongst African children
Source: eLife journal article supplement (doi:10.7554/elife.29198), 2017-10-16
Supplement: supp [file elife-29198-supp-v1.zip]

Archive with 8 entries (8 files):
- elife_poa_e29198_Transparent_Reporting_File.pdf
- elife_poa_e29198_Supplementary_File_1.xlsx
- elife_poa_e29198_Supplementary_File_2.xlsx
- elife_poa_e29198_Figure_5_figure_supplement_2.pdf
- elife_poa_e29198_Figure_1_figure_supplement_1.pdf
- elife_poa_e29198_Supplementary_File_3.xlsx
- elife_poa_e29198_Supplementary_File_4.docx
- elife_poa_e29198_Figure_5_figure_supplement_1.pdf
