# Supplementary material for: Quantifying the contribution of Plasmodium falciparum malaria to febrile illness amongst African children
Source: eLife journal article supplement (doi:10.7554/elife.29198), 2017-10-16
Supplement: supp [file elife-29198-supp-v1.zip › elife_poa_e29198_Supplementary_File_1.xlsx]

## Sheet: Suppl 1
Supplementary File 1: Yearly population-weighted percentages for all-cause fever prevalence, and malaria-attributable fever, malaria-positive fever, and non-malarial febrile illness within all-cause fever amongst population at risk in children under 5 years of age in malaria-endemic Africa, 2006-2014.
2006						2007						2008						2009						2010						2011						2012						2013						2014
Country	Population at risk (<5 years old)	All-cause fever prevalence (%)	Fevers with a malaria infection prevalence within all-cause fever (%)	MAF prevalence within malaria-positive fever (%)	NMFI prevalence within all-cause fever (%)	Country	Population at risk (<5 years old)	All-cause fever prevalence (%)	Fevers with a malaria infection prevalence within all-cause fever (%)	MAF prevalence within malaria-positive fever (%)	NMFI prevalence within all-cause fever (%)	Country	Population at risk (<5 years old)	All-cause fever prevalence (%)	Fevers with a malaria infection prevalence within all-cause fever (%)	MAF prevalence within malaria-positive fever (%)	NMFI prevalence within all-cause fever (%)	Country	Population at risk (<5 years old)	All-cause fever prevalence (%)	Fevers with a malaria infection prevalence within all-cause fever (%)	MAF prevalence within malaria-positive fever (%)	NMFI prevalence within all-cause fever (%)	Country	Population at risk (<5 years old)	All-cause fever prevalence (%)	Fevers with a malaria infection prevalence within all-cause fever (%)	MAF prevalence within malaria-positive fever (%)	NMFI prevalence within all-cause fever (%)	Country	Population at risk (<5 years old)	All-cause fever prevalence (%)	Fevers with a malaria infection prevalence within all-cause fever (%)	MAF prevalence within malaria-positive fever (%)	NMFI prevalence within all-cause fever (%)	Country	Population at risk (<5 years old)	All-cause fever prevalence (%)	Fevers with a malaria infection prevalence within all-cause fever (%)	MAF prevalence within malaria-positive fever (%)	NMFI prevalence within all-cause fever (%)	Country	Population at risk (<5 years old)	All-cause fever prevalence (%)	Fevers with a malaria infection prevalence within all-cause fever (%)	MAF prevalence within malaria-positive fever (%)	NMFI prevalence within all-cause fever (%)	Country	Population at risk (<5 years old)
Angola	3.38617e+06	19.8346	44.8317	53.5185	76.0068	Angola	3.49737e+06	19.4329	38.468	52.7253	79.7176	Angola	3.60629e+06	16.8522	30.0515	57.23	82.8015	Angola	3.71036e+06	36.6723	16.3922	27.92	95.4233	Angola	3.8068e+06	36.3608	15.2302	28.1994	95.7052	Angola	3.89336e+06	37.6646	16.023	26.851	95.6976	Angola	3.9707e+06	36.5135	17.4584	27.7669	95.1523	Angola	4.03996e+06	30.031	21.5521	35.3925	92.3722	Angola	4.10195e+06
Benin	1.45496e+06	31.4792	51.6509	32.9932	82.9587	Benin	1.48699e+06	32.7008	49.2156	31.6577	84.4195	Benin	1.51833e+06	33.0239	45.1709	31.7155	85.6738	Benin	1.54892e+06	27.7048	43.6664	38.3896	83.2366	Benin	1.57864e+06	25.3523	42.4313	41.7823	82.2712	Benin	1.60742e+06	26.9573	38.8677	39.2335	84.7508	Benin	1.6353e+06	11.2983	59.6798	73.5895	56.082	Benin	1.66233e+06	24.259	39.0419	42.3914	83.4496	Benin	1.68854e+06
Botswana	123844	12.8026	2.73124	61.296	98.3259	Botswana	124635	14.4549	2.41943	59.3126	98.565	Botswana	125522	18.4423	1.80748	52.2255	99.056	Botswana	126366	16.6742	2.15665	55.8199	98.7962	Botswana	127026	15.5964	1.8922	57.9544	98.9034	Botswana	127391	17.3279	1.63609	54.3756	99.1104	Botswana	127486	15.0781	1.57525	56.966	99.1026	Botswana	127364	12.5051	2.23786	63.395	98.5813	Botswana	127068
Burkina Faso	2.54607e+06	25.6986	80.0833	45.9858	63.173	Burkina Faso	2.61054e+06	26.7284	80.944	43.9335	64.4384	Burkina Faso	2.67471e+06	25.9359	84.0156	45.4478	61.8168	Burkina Faso	2.73801e+06	27.1554	85.014	42.2105	64.1152	Burkina Faso	2.79985e+06	24.3964	85.4592	48.0393	58.946	Burkina Faso	2.85974e+06	26.531	81.2237	43.8438	64.3884	Burkina Faso	2.91783e+06	34.3808	73.6209	31.709	76.6555	Burkina Faso	2.97435e+06	41.9518	63.9698	23.8137	84.7664	Burkina Faso	3.02948e+06
Burundi	1.27976e+06	25.1036	48.0204	43.5675	79.0787	Burundi	1.33942e+06	19.3952	50.807	53.9762	72.5763	Burundi	1.40338e+06	24.6566	43.8982	43.6626	80.8329	Burundi	1.46897e+06	22.5344	45.4452	47.0023	78.6397	Burundi	1.5336e+06	22.7843	41.0377	45.8418	81.1876	Burundi	1.59526e+06	37.9879	30.6404	26.3391	91.9296	Burundi	1.65432e+06	44.1494	26.1046	21.2214	94.4602	Burundi	1.71168e+06	41.1186	22.9811	23.6581	94.5631	Burundi	1.76818e+06
Cameroon	3.16035e+06	22.6178	64.691	51.2101	66.8717	Cameroon	3.22856e+06	22.3015	61.6827	51.631	68.1526	Cameroon	3.29614e+06	31.4261	49.8599	36.0932	82.004	Cameroon	3.36278e+06	27.5828	46.4985	40.7208	81.0654	Cameroon	3.42813e+06	29.6043	41.5238	36.6322	84.7889	Cameroon	3.49192e+06	29.7762	37.2073	35.442	86.813	Cameroon	3.55423e+06	30.6277	35.7285	33.6589	87.9742	Cameroon	3.61522e+06	29.8623	37.5602	34.7025	86.9657	Cameroon	3.67499e+06
Central African Republic	621620	30.3227	81.4985	36.3912	70.3417	Central African Republic	625125	29.9565	78.1767	37.0303	71.0509	Central African Republic	628567	23.0841	79.697	50.6555	59.6291	Central African Republic	632589	23.8685	76.4482	48.7304	62.7465	Central African Republic	637857	29.6914	71.2407	38.1181	72.8444	Central African Republic	644900	28.5006	70.0943	39.9146	72.0222	Central African Republic	653583	28.6534	68.9715	39.8971	72.4824	Central African Republic	663647	15.6408	82.7612	72.0495	40.3709	Central African Republic	674893
Chad	1.99489e+06	29.9032	31.9366	34.2691	89.0556	Chad	2.04982e+06	17.2426	34.6693	54.4672	81.1166	Chad	2.1034e+06	18.1314	33.227	51.9789	82.729	Chad	2.15611e+06	17.532	32.9207	53.1403	82.5058	Chad	2.20839e+06	33.5475	24.2237	28.3525	93.132	Chad	2.26055e+06	27.2322	23.8349	37.1048	91.1561	Chad	2.31257e+06	34.8534	21.4299	27.0355	94.2063	Chad	2.36431e+06	37.5838	20.5485	24.9638	94.8703	Chad	2.41562e+06
Congo	600786	29.9267	51.6431	35.1588	81.8429	Congo	619377	27.6256	47.6691	38.3381	81.7245	Congo	638329	29.4264	42.5228	35.2291	85.0196	Congo	657226	29.8297	39.5473	34.2157	86.4686	Congo	675646	25.909	39.4395	39.4748	84.4313	Congo	693261	27.0606	38.1504	38.106	85.4624	Congo	710145	20.767	40.4583	47.9355	80.6061	Congo	726451	20.0008	40.0745	48.0603	80.7401	Congo	742310
Cote d'Ivoire	2.7993e+06	19.4867	81.0599	60.2472	51.1637	Cote d'Ivoire	2.82346e+06	19.1346	80.0054	61.0992	51.1173	Cote d'Ivoire	2.85181e+06	22.2549	74.3418	53.0531	60.5594	Cote d'Ivoire	2.88824e+06	22.2686	70.7791	52.8686	62.5801	Cote d'Ivoire	2.93698e+06	19.1496	71.2337	60.2194	57.1035	Cote d'Ivoire	3.00144e+06	29.2174	58.5704	39.0201	77.1458	Cote d'Ivoire	3.0806e+06	29.3329	54.7097	38.6277	78.8669	Cote d'Ivoire	3.1727e+06	28.577	54.8531	39.1493	78.5254	Cote d'Ivoire	3.27653e+06
Democratic Republic of the Congo	9.97656e+06	24.6652	79.1183	44.8134	64.5444	Democratic Republic of the Congo	1.02086e+07	25.7332	78.071	42.296	66.9791	Democratic Republic of the Congo	1.04416e+07	36.5052	72.0623	26.9448	80.583	Democratic Republic of the Congo	1.06749e+07	36.6139	68.7282	26.5949	81.7218	Democratic Republic of the Congo	1.09081e+07	38.121	64.5472	24.805	83.9891	Democratic Republic of the Congo	1.11405e+07	35.4252	59.3375	27.6251	83.6079	Democratic Republic of the Congo	1.13723e+07	29.6713	53.6729	34.1687	81.6607	Democratic Republic of the Congo	1.16037e+07	33.2301	48.3278	29.3572	85.8123	Democratic Republic of the Congo	1.18348e+07
Djibouti	13802.3	8.43328	10.4096	74.4891	92.246	Djibouti	13808.5	8.38142	7.88199	73.3037	94.2222	Djibouti	13830.5	6.44167	6.58768	79.6767	94.7512	Djibouti	13873.4	4.93187	5.02697	84.2526	95.7646	Djibouti	13943.2	6.50362	3.63554	79.9299	97.0941	Djibouti	14044.9	6.36599	5.98603	79.6926	95.2296	Djibouti	14176.7	8.37676	7.25209	73.9004	94.6407	Djibouti	14335.9	6.58437	14.6394	78.9028	88.4491	Djibouti	14520.8
Equatorial Guinea	92547.1	36.7224	78.1632	17.9732	85.9516	Equatorial Guinea	95115	27.8162	76.0308	28.1411	78.6041	Equatorial Guinea	97798.2	27.8457	63.3044	28.9126	81.6971	Equatorial Guinea	100502	23.3818	50.4522	35.6006	82.0387	Equatorial Guinea	103132	27.7463	44.3027	38.1257	83.1093	Equatorial Guinea	105616	16.5439	62.5499	61.2883	61.6642	Equatorial Guinea	107968	18.239	56.9715	56.7144	67.689	Equatorial Guinea	110222	15.2297	62.3799	64.5412	59.7393	Equatorial Guinea	112407
Eritrea	841322	6.49132	6.0198	77.7784	95.3179	Eritrea	871449	5.98228	5.76364	79.3353	95.4274	Eritrea	900880	6.2168	5.30985	78.9204	95.8094	Eritrea	929358	6.60664	4.88171	77.4845	96.2174	Eritrea	956585	4.42061	6.52774	85.0228	94.4499	Eritrea	982313	7.02176	3.74528	77.5288	97.0963	Eritrea	1.00663e+06	7.69395	3.75128	75.1347	97.1815	Eritrea	1.02967e+06	7.19051	4.23114	76.3214	96.7707	Eritrea	1.05152e+06
Ethiopia	1.1659e+07	22.8467	7.55988	41.6806	96.849	Ethiopia	1.17395e+07	24.2332	5.92816	39.6524	97.6493	Ethiopia	1.18105e+07	24.1031	3.24607	41.8589	98.6412	Ethiopia	1.18817e+07	24.5015	1.73959	42.0268	99.2689	Ethiopia	1.19628e+07	24.2302	1.53328	42.0871	99.3547	Ethiopia	1.20614e+07	23.6868	1.35946	43.0715	99.4145	Ethiopia	1.2176e+07	25.5552	1.49283	39.9409	99.4037	Ethiopia	1.23029e+07	24.3937	1.51805	41.3486	99.3723	Ethiopia	1.24391e+07
Gabon	207182	30.2202	21.0406	35.0146	92.6327	Gabon	212039	41.8029	14.4356	23.6904	96.5802	Gabon	217064	38.7447	14.1456	26.2212	96.2909	Gabon	222166	37.999	18.869	26.5714	94.9862	Gabon	227259	29.039	25.4038	35.0456	91.0971	Gabon	232275	41.2442	24.7272	23.2449	94.2522	Gabon	237225	39.5299	30.2067	24.4441	92.6162	Gabon	242140	30.3693	36.8708	33.9155	87.4951	Gabon	247048
Gambia	269213	20.5667	12.2455	46.9993	94.2447	Gambia	276874	22.9655	9.32864	44.3619	95.8616	Gambia	284740	23.007	8.15208	44.5794	96.3659	Gambia	292905	16.502	6.19688	56.6796	96.4876	Gambia	301476	15.6003	5.57276	58.2866	96.7518	Gambia	310540	19.9419	4.74705	49.9552	97.6286	Gambia	320066	16.1904	4.25015	56.6834	97.5909	Gambia	330010	15.7504	4.06595	57.8321	97.6486	Gambia	340340
Ghana	3.27954e+06	30.5958	58.5639	34.0879	80.0368	Ghana	3.35011e+06	28.8579	58.5141	36.2928	78.7636	Ghana	3.41911e+06	27.8124	58.3447	37.8006	77.9454	Ghana	3.48472e+06	26.9154	61.5622	38.5183	76.2873	Ghana	3.54497e+06	22.6703	67.5957	46.6244	68.4839	Ghana	3.59829e+06	18.0717	70.2344	58.7908	58.7086	Ghana	3.64514e+06	25.7843	58.3972	41.6317	75.6883	Ghana	3.68631e+06	23.5647	55.5807	45.7715	74.5599	Ghana	3.72239e+06
Guinea	1.64345e+06	37.8728	51.5285	26.4784	86.3561	Guinea	1.6764e+06	29.0526	53.9688	36.7193	80.183	Guinea	1.71092e+06	22.8766	59.2876	47.3977	71.899	Guinea	1.746e+06	30.095	53.6445	35.5982	80.9035	Guinea	1.7807e+06	29.5509	53.6841	36.3151	80.5046	Guinea	1.81425e+06	34.9564	52.2764	29.6602	84.4947	Guinea	1.8468e+06	34.7624	53.1079	30.0285	84.0525	Guinea	1.87869e+06	27.6772	55.1658	38.8413	78.5729	Guinea	1.91023e+06
Guinea-Bissau	238089	9.15128	28.2862	69.4797	80.3468	Guinea-Bissau	242171	28.4973	12.8951	31.5704	95.929	Guinea-Bissau	246315	29.315	12.4111	30.7616	96.1821	Guinea-Bissau	250535	31.7392	12.6288	28.6525	96.3815	Guinea-Bissau	254847	33.1458	13.7291	27.5917	96.2119	Guinea-Bissau	259266	27.8809	15.8691	33.4523	94.6914	Guinea-Bissau	263784	28.4127	15.6088	33.4083	94.7854	Guinea-Bissau	268394	26.1785	17.0668	36.9191	93.6991	Guinea-Bissau	273092
Kenya	5.26291e+06	26.5125	11.4908	34.815	95.9995	Kenya	5.39306e+06	26.9949	9.30738	33.6062	96.8721	Kenya	5.51724e+06	26.5182	8.62969	34.1165	97.0559	Kenya	5.63345e+06	26.8436	9.90082	32.337	96.7984	Kenya	5.73938e+06	28.7006	10.6898	30.3006	96.7609	Kenya	5.83311e+06	27.7587	11.3617	31.0562	96.4715	Kenya	5.91534e+06	33.2141	12.4117	26.3951	96.7239	Kenya	5.98712e+06	37.0648	13.727	23.2183	96.8128	Kenya	6.04907e+06
Liberia	585744	50.6657	54.5953	17.7017	90.3357	Liberia	604904	50.1236	51.558	18.1506	90.6419	Liberia	624125	52.5077	47.4321	16.8122	92.0256	Liberia	642423	53.4069	44.2907	16.3653	92.7517	Liberia	658777	51.3393	40.0246	17.7373	92.9007	Liberia	672372	52.9771	39.3668	16.6798	93.4337	Liberia	683421	54.113	41.7268	15.9407	93.3485	Liberia	692316	49.3038	47.8798	18.8025	90.9974	Liberia	699366
Madagascar	3.09656e+06	26.7048	26.4658	39.7022	89.4925	Madagascar	3.14792e+06	26.5853	23.1515	39.6958	90.8098	Madagascar	3.201e+06	22.3068	19.1173	45.8515	91.2344	Madagascar	3.25719e+06	18.1363	16.3457	53.3658	91.277	Madagascar	3.318e+06	15.1635	14.7004	58.3637	91.4203	Madagascar	3.38465e+06	16.1085	10.871	58.1605	93.6774	Madagascar	3.45676e+06	19.0626	10.4661	51.586	94.6009	Madagascar	3.5337e+06	12.9511	15.7541	63.8837	89.9357	Madagascar	3.61505e+06
Malawi	2.37133e+06	29.1226	58.3237	36.7242	78.5811	Malawi	2.46331e+06	37.9148	57.3636	26.328	84.8973	Malawi	2.55724e+06	28.6941	66.2543	37.8119	74.948	Malawi	2.64665e+06	28.8063	70.177	37.7506	73.5078	Malawi	2.72489e+06	35.6745	63.9673	28.5867	81.7138	Malawi	2.78666e+06	26.3978	63.0376	41.2535	73.9948	Malawi	2.83329e+06	29.4316	52.2668	35.8871	81.2429	Malawi	2.86732e+06	31.1441	40.0885	33.4834	86.577	Malawi	2.89075e+06
Mali	2.3014e+06	33.6066	45.6417	32.0444	85.3744	Mali	2.37972e+06	30.5887	42.8733	35.2634	84.8814	Mali	2.46017e+06	29.5874	37.901	36.2945	86.244	Mali	2.54258e+06	16.3415	45.9671	59.7118	72.5522	Mali	2.62682e+06	29.8479	37.7336	35.0801	86.763	Mali	2.71285e+06	29.0211	39.7873	36.2015	85.5964	Mali	2.80059e+06	13.2803	62.8505	71.0497	55.3449	Mali	2.89005e+06	12.7965	67.9803	73.9535	49.7262	Mali	2.98128e+06
Mauritania	404505	16.4808	7.87969	55.3741	95.6367	Mauritania	413187	18.9733	6.3651	50.679	96.7742	Mauritania	421759	17.1076	7.14829	54.4249	96.1096	Mauritania	430172	15.9441	7.00927	56.6365	96.0302	Mauritania	438375	15.4405	4.6041	56.671	97.3908	Mauritania	446322	15.7641	4.20073	56.1947	97.6394	Mauritania	454028	17.4466	3.91098	52.6258	97.9418	Mauritania	461517	16.0222	4.10692	54.797	97.7495	Mauritania	468805
Mozambique	3.9657e+06	18.7233	67.9447	57.5491	60.8984	Mozambique	4.0478e+06	18.4335	64.6151	56.7149	63.3536	Mozambique	4.1208e+06	28.37	53.6764	37.162	80.0528	Mozambique	4.18785e+06	17.9257	64.4786	57.4974	62.9265	Mozambique	4.25186e+06	29.5093	54.7117	34.7938	80.9637	Mozambique	4.31503e+06	17.4069	63.3274	58.6817	62.8384	Mozambique	4.3771e+06	18.0761	64.4143	57.9337	62.6824	Mozambique	4.43716e+06	17.7553	60.3426	58.4885	64.7065	Mozambique	4.49422e+06
Namibia	199589	28.8736	10.481	38.4819	95.9667	Namibia	199036	27.1605	8.85346	40.4099	96.4223	Namibia	198531	31.3625	6.62346	36.2719	97.5975	Namibia	198126	26.8376	5.74079	42.2899	97.5722	Namibia	197881	27.9551	4.50184	40.43	98.1799	Namibia	197842	27.3559	4.52708	41.7793	98.1086	Namibia	197995	25.1802	5.45255	43.5704	97.6243	Namibia	198316	21.8675	6.30143	47.5827	97.0016	Namibia	198789
Niger	2.78461e+06	55.0791	43.3068	14.769	93.604	Niger	2.88818e+06	56.9589	45.1056	13.6364	93.8492	Niger	2.99588e+06	53.3661	49.4924	15.3867	92.3848	Niger	3.10869e+06	49.1876	52.8812	18.0249	90.4682	Niger	3.22777e+06	56.8119	54.4906	12.9591	92.9385	Niger	3.35414e+06	29.4296	59.8859	35.9378	78.4783	Niger	3.48738e+06	29.759	56.8858	35.5256	79.791	Niger	3.62694e+06	31.2431	49.0773	33.1501	83.7308	Niger	3.77252e+06
Nigeria	2.50094e+07	38.1082	59.3591	25.8666	84.6458	Nigeria	2.57335e+07	41.4306	58.3167	22.5639	86.8415	Nigeria	2.64761e+07	38.7207	58.6599	24.8496	85.4232	Nigeria	2.72364e+07	43.7284	52.561	20.2962	89.3321	Nigeria	2.80146e+07	43.0285	50.1144	20.6309	89.661	Nigeria	2.8811e+07	40.7093	48.9106	22.4466	89.0212	Nigeria	2.96249e+07	40.6363	48.5249	22.5169	89.0737	Nigeria	3.04557e+07	42.6667	48.3102	21.0617	89.8251	Nigeria	3.13037e+07
Rwanda	1.28352e+06	11.1602	19.4781	68.7294	86.6128	Rwanda	1.32851e+06	12.2218	15.4981	65.8501	89.7945	Rwanda	1.38113e+06	11.4655	14.4445	67.6467	90.2288	Rwanda	1.43505e+06	22.4569	9.09739	46.5188	95.768	Rwanda	1.48401e+06	18.393	9.9123	52.9194	94.7545	Rwanda	1.52309e+06	15.4866	10.8728	58.4228	93.6478	Rwanda	1.55333e+06	14.9376	11.4772	58.3894	93.2985	Rwanda	1.57696e+06	18.52	11.0953	51.3673	94.3006	Rwanda	1.59596e+06
Senegal	1.96481e+06	12.9785	20.9098	64.059	86.6054	Senegal	2.01892e+06	12.197	18.3908	66.0872	87.846	Senegal	2.07471e+06	26.5523	11.4411	39.6355	95.4652	Senegal	2.13185e+06	26.7974	11.2586	39.8497	95.5135	Senegal	2.19006e+06	25.72	11.0125	40.8401	95.5025	Senegal	2.24915e+06	22.1852	10.2721	45.336	95.343	Senegal	2.30911e+06	25.0204	7.90307	40.6324	96.7888	Senegal	2.37002e+06	23.2775	7.54935	41.9066	96.8363	Senegal	2.43197e+06
Sierra Leone	879657	34.2483	57.3646	31.528	81.9141	Sierra Leone	891570	34.7768	57.1612	30.9746	82.2945	Sierra Leone	900354	37.7335	59.8678	27.8967	83.2988	Sierra Leone	907356	36.4409	61.5914	29.3586	81.9176	Sierra Leone	913852	40.2245	62.3524	25.3055	84.2214	Sierra Leone	920814	40.5138	60.3912	25.1058	84.8383	Sierra Leone	928097	31.3007	60.4288	35.239	78.7055	Sierra Leone	935283	29.4561	56.7399	37.3507	78.8073	Sierra Leone	941950
Somalia	1.64769e+06	10.9379	15.7452	67.0517	89.4426	Somalia	1.68631e+06	9.83887	10.8515	68.0932	92.6109	Somalia	1.72607e+06	9.4667	5.65459	71.848	95.9373	Somalia	1.76652e+06	8.49832	4.18807	76.1371	96.8113	Somalia	1.80726e+06	9.1335	3.35385	75.0408	97.4832	Somalia	1.84798e+06	9.48778	3.87774	74.0482	97.1286	Somalia	1.88873e+06	10.8036	4.91281	68.9246	96.6139	Somalia	1.92964e+06	9.70154	8.4273	70.3061	94.0751	Somalia	1.97083e+06
South Africa	724213	13.4819	12.9116	59.5342	92.3132	South Africa	735976	12.6602	9.43567	61.7526	94.1732	South Africa	747053	14.9486	4.82213	57.4978	97.2274	South Africa	755874	11.9204	7.41132	63.5224	95.2921	South Africa	760775	13.3235	6.27567	59.6004	96.2597	South Africa	760421	12.3923	5.96965	63.0158	96.2382	South Africa	755185	11.0773	6.66686	65.4177	95.6387	South Africa	745730	11.634	10.622	63.1734	93.2897	South Africa	732545
South Sudan	1.36383e+06	21.9402	47.6628	39.2537	81.2906	South Sudan	1.41088e+06	21.4311	46.1367	39.2426	81.8947	South Sudan	1.46005e+06	21.9819	45.1086	36.9481	83.3332	South Sudan	1.51083e+06	27.2169	40.4562	29.8343	87.9302	South Sudan	1.56278e+06	26.1024	41.446	30.9197	87.185	South Sudan	1.61558e+06	21.1841	41.3953	37.9262	84.3003	South Sudan	1.66925e+06	23.5604	39.0617	36.4307	85.7695	South Sudan	1.7239e+06	25.0266	35.4421	34.0234	87.9414	South Sudan	1.77969e+06
Sudan	5.06621e+06	18.4597	10.4354	44.3495	95.372	Sudan	5.1321e+06	17.3411	9.46809	45.8182	95.6619	Sudan	5.19232e+06	21.0156	7.37817	40.6242	97.0027	Sudan	5.2489e+06	21.345	6.85319	40.5893	97.2183	Sudan	5303709	21.1215	6.49339	40.8223	97.3492	Sudan	5.35815e+06	16.7927	6.88092	48.1435	96.6873	Sudan	5.41205e+06	18.3743	6.79793	44.8571	96.9506	Sudan	5.46482e+06	20.5116	6.82937	41.3241	97.1778	Sudan	5.51584e+06
Swaziland	3159.49	15.3862	0.486857	65.0398	99.6833	Swaziland	3198.43	11.8802	0.442945	70.9817	99.6856	Swaziland	3241.16	12.2426	0.379672	69.4734	99.7362	Swaziland	3283.8	12.595	0.826932	67.3155	99.4433	Swaziland	3322.47	11.4278	1.57123	69.1282	98.9138	Swaziland	3354.12	10.3329	1.65009	71.3275	98.823	Swaziland	3379.44	10.33	1.43378	71.09	98.9807	Swaziland	3399.81	5.64472	2.39493	83.474	98.0009	Swaziland	3416.47
Togo	915710	30.3307	69.8087	36.154	74.7613	Togo	937633	28.5789	70.681	38.7672	72.599	Togo	959846	32.8934	67.5607	32.9768	77.7206	Togo	982224	38.2775	64.3302	26.3761	83.0322	Togo	1.00465e+06	31.7536	65.0949	33.4896	78.2	Togo	1.02702e+06	36.6801	58.9964	27.8514	83.5687	Togo	1.04937e+06	31.5228	57.3893	33.3175	80.8793	Togo	1.07172e+06	29.8837	54.885	34.5325	81.0469	Togo	1.09411e+06
Uganda	5.73978e+06	21.7419	71.5092	49.5518	64.5659	Uganda	5.91255e+06	23.7383	67.3921	44.4175	70.0661	Uganda	6.08597e+06	39.6126	60.8807	23.2934	85.8188	Uganda	6.25979e+06	41.3025	62.3676	21.3696	86.6723	Uganda	6.43376e+06	40.9832	58.8479	21.227	87.5084	Uganda	6.6077e+06	35.2228	52.875	26.6343	85.9171	Uganda	6.78163e+06	37.0852	43.1816	24.8415	89.273	Uganda	6.95563e+06	37.5924	34.0509	24.4285	91.6819	Uganda	7.12979e+06
United Republic of Tanzania	6.96213e+06	20.8065	35.8303	44.7421	83.9688	United Republic of Tanzania	7.20027e+06	22.0019	31.6383	42.2037	86.6475	United Republic of Tanzania	7.44154e+06	21.303	27.6426	43.2501	88.0445	United Republic of Tanzania	7.67904e+06	21.7608	26.6665	42.0476	88.7874	United Republic of Tanzania	7.90571e+06	20.0096	25.1336	45.3156	88.6106	United Republic of Tanzania	8.11597e+06	22.3091	18.3691	41.3819	92.3985	United Republic of Tanzania	8.31119e+06	22.6471	16.8951	40.3126	93.1891	United Republic of Tanzania	8.49401e+06	20.6885	16.4535	43.8783	92.7805	United Republic of Tanzania	8.66659e+06
Zambia	2.19758e+06	20.6705	33.0803	49.6646	83.5708	Zambia	2.24802e+06	18.5522	29.3145	53.1195	84.4283	Zambia	2.30009e+06	17.3544	26.3308	54.393	85.6779	Zambia	2.3561e+06	18.424	26.9402	52.3248	85.9036	Zambia	2.41849e+06	15.6464	30.6067	57.5847	82.3752	Zambia	2.48924e+06	20.5061	24.151	47.8981	88.4321	Zambia	2.56777e+06	17.1373	32.647	52.7203	82.7884	Zambia	2.65309e+06	18.3201	38.4701	52.0122	79.9908	Zambia	2.74448e+06
Zimbabwe	1.84244e+06	17.4975	6.01418	51.3536	96.9115	Zimbabwe	1.86346e+06	16.1116	6.71634	54.3466	96.3499	Zimbabwe	1.88759e+06	16.7617	6.3146	53.5329	96.6196	Zimbabwe	1.91417e+06	22.0157	5.47798	45.2944	97.5188	Zimbabwe	1.94267e+06	18.3851	4.69302	51.3085	97.5921	Zimbabwe	1.97269e+06	17.9205	4.52248	52.521	97.6247	Zimbabwe	2.00422e+06	14.1166	5.55792	60.3831	96.644	Zimbabwe	2.0374e+06	16.9911	5.64788	55.2536	96.8793	Zimbabwe	2.07243e+06
[truncated: 4 more columns]
