# Supplementary material for: Quantifying the contribution of Plasmodium falciparum malaria to febrile illness amongst African children
Source: eLife journal article supplement (doi:10.7554/elife.29198), 2017-10-16
Supplement: supp [file elife-29198-supp-v1.zip › elife_poa_e29198_Supplementary_File_2.xlsx]

## Sheet: HH survey data information
Supplementary File 2: Household survey data used in analysis.								Overall 2x2 table of survey data and predictions:
Country	Survey years	Source	Tested	R+F+	R+F-	R-F+	R-F-	Household survey data
Angola	2006-2007	DHS Program	1156	73	210	170	703		Total number (N= 155,369)				Proportion
Angola	2011	DHS Program	2828	170	171	875	1612			RDT +	RDT -			RDT +	RDT -
Benin	2011-2012	DHS Program	3095	125	681	238	2051		Fever +	15177	26111		Fever +	0.0976836	0.168058
Burkina Faso	2010	DHS Program	5300	941	3048	291	1020		Fever -	23052	91029		Fever -	0.148369	0.585889
Burkina Faso	2014	DHS Program	5354	1742	1728	607	1277
Burundi	2012	DHS Program	3465	473	226	1024	1742	Predictions*
Cameroon	2011	DHS Program	4511	633	747	759	2372		Total number (N= 206,178,365)
Cote d'Ivoire	2011-2012	DHS Program	2557	340	790	356	1071			RDT +	RDT -			RDT +	RDT -
DR Congo	2013-2014	DHS Program	6430	921	1272	1194	3043		Fever +	24425776	37088228		Fever +	0.118469	0.179884
Ghana	2011	UNICEF MICS	4352	828	1707	281	1536		Fever -	34151725	110512636		Fever -	0.165642	0.536005
Ghana	2014	DHS Program	2311	205	719	175	1212
Guinea	2012	DHS Program	2741	503	671	445	1122
Kenya	2015	DHS Program	2844	153	85	982	1624		*Predicted values are the total population within stable P. falciparum transmission zones of all children under five years of age in surveyed country-years detailed above (e.g. Mozambique was surveyed in 2011, so predicted values include all children at risk of P. falciparum in Mozambique in 2011. For surveys spanning two years, both years were included in predicted values.)
Liberia	2009	DHS Program	3024	523	511	933	1057
Liberia	2011	DHS Program	2333	710	468	654	501
Madagascar	2011	DHS Program	5204	113	210	747	4134
Madagascar	2013	DHS Program	4476	79	199	537	3661
Madagascar	2016	DHS Program	3139	34	71	459	2575
Malawi	2012	DHS Program	1890	366	352	267	905
Malawi	2014	DHS Program	1717	262	238	271	946
Mali	2010	DHS Program	1716	344	293	337	742
Mali	2012-2013	DHS Program	4108	231	1547	183	2147
Mali	2015	DHS Program	6618	788	1132	1225	3473
Mozambique	2011	DHS Program	4320	279	1188	330	2523
Namibia	2009	Namibian Ministry of Health*	1142	9	22	332	779
Nigeria	2015	DHS Program	4814	1127	830	1038	1819
Rwanda	2010	DHS Program	3619	21	58	595	2945
Rwanda	2014-2015	DHS Program	3110	105	125	521	2359
Senegal	2008-2009	DHS Program	3508	175	248	1001	2084
Senegal	2010-2011	DHS Program	3209	27	78	688	2416
Senegal	2012-2013	DHS Program	5274	82	135	898	4159
Swaziland	2010	Swaziland NMCP✝	257	1	0	32	224
Tanzania	2007-2008	DHS Program	5496	234	450	781	4031
Tanzania	2011-2012	DHS Program	6230	254	338	1141	4497
Togo	2013-2014	DHS Program	2844	309	731	367	1437
Uganda	2009	DHS Program	3361	1037	710	570	1044
Uganda	2014-2015	DHS Program	3983	640	654	670	2019
R+/- = RDT positive/negative; F+/- = Fever positive/negative
*Reference: National Vector-Borne Diseases Control Programme of the Ministry of Health and Social Services, the National Planning Commission/Central Bureau of Statistics, the Namibia Defense Force (NDF), the National Institute of Pathology (NIP),and WHO. Namibia Malaria Incidator Survey 2009. Windhoek, Namibia, 2009.
✝Reference: National Malaria Control Programme (NMCP) of the Ministry of Health and Social Welfare and the Central Statistical Office of the Ministry of Economic Planning, the Clinton Health Access Initiative, the Global Health Group of the University of California, WHO. Swaziland Malaria Indicator Survey 2010.
