# Supplementary material for: Quantifying the contribution of Plasmodium falciparum malaria to febrile illness amongst African children
Source: eLife journal article supplement (doi:10.7554/elife.29198), 2017-10-16
Supplement: supp [file elife-29198-supp-v1.zip › elife_poa_e29198_Supplementary_File_3.xlsx]

## Sheet: Supplementary File 3
Supplementary File 3: Covariates used in BRT, listed by contribution to the final model. EVI: Enhanced Vegetation Index; GUF: Global Urban Footprint; LST: Land Surface Temperature; PET - potential evapotranspiration; TCB - Tassled Cap Brightness; TCW - Tassled Cap Wetness; TMI - Topographic Moisture Index; TSI - Temperature Suitability Index; WB - World Bank Variable. “Product” definitions for EV…
Contribution to final model (%)	Variable Type	Product type	Spatial summary	Temporal resolution	Lag
7.2029	Proportion of children in primary school (WB National)	-	N/A	Yearly	N/A
5.88021	Percentage of pregnant women who receive prenatal care (WB National)	-	N/A	Yearly	N/A
4.37259	DPT immunisation coverage (WB annual)	-	N/A	Yearly	N/A
2.6557	Public expenditure on health system (WB national)	-	N/A	Yearly	N/A
2.60443	Annual GDP growth (WB national)	-	N/A	Yearly	N/A
1.704	Precipitation	-	N/A	Stationary	N/A
1.61846	Precipitation	-	N/A	Stationary	N/A
1.25239	LST night	Delta dynamic	Mean	Fully dynamic	1
1.23703	EVI	Delta annual	Minimum	Fully dynamic	0
1.10194	LST night	Delta monthly	Range	Fully dynamic	4
1.00196	EVI	Delta monthly	Standard deviation	Fully dynamic	4
1.00165	LST delta	Delta annual	Mean	Fully dynamic	0
0.97658	EVI	Delta dynamic	Mean	Fully dynamic	1
0.972081	LST day	Delta annual	Maximum	Fully dynamic	1
0.970217	TSI	Monthly synoptic	Mean	Month only	2
0.924462	Precipitation	-	N/A	Stationary	N/A
0.893019	LST day	Monthly synoptic	Standard deviation	Month only	2
0.891801	LST day	Delta dynamic	Range	Fully dynamic	2
0.875182	LST delta	Monthly synoptic	Mean	Month only	0
0.869924	LST day	Delta monthly	Minimum	Fully dynamic	1
0.853027	TSI	Delta monthly	Maximum	Fully dynamic	0
0.838487	LST night	Delta monthly	Minimum	Fully dynamic	0
0.822455	Precipitation	-	N/A	Stationary	N/A
0.82114	EVI	Monthly synoptic	Minimum	Month only	4
0.81093	TSI	Monthly synoptic	Range	Month only	3
0.774293	TSI	Delta monthly	Minimum	Fully dynamic	4
0.756606	EVI	Delta monthly	Minimum	Fully dynamic	1
0.755252	TCB	Delta annual	Standard deviation	Fully dynamic	4
0.748729	TCB	Delta annual	Maximum	Fully dynamic	3
0.747633	TMI	-	Maximum	Stationary	N/A
0.73675	Accessibility	-	Standard deviation	Stationary	N/A
0.734986	Land cover	Fraction	N/A	Yearly	N/A
0.73172	TSI	Monthly synoptic	Mean	Month only	3
0.68857	TCB	Delta monthly	Mean	Fully dynamic	1
0.677638	LST night	Delta dynamic	Minimum	Fully dynamic	0
0.672206	LST delta	Delta monthly	Mean	Fully dynamic	0
0.663369	TCB	Monthly synoptic	Mean	Month only	4
0.64273	LST delta	Monthly synoptic	Mean	Month only	1
0.64	EVI	Monthly synoptic	Range	Month only	2
0.632918	LST night	Delta dynamic	Mean	Fully dynamic	3
0.614981	EVI	Delta monthly	Minimum	Fully dynamic	0
0.606374	TCW	Delta monthly	Mean	Fully dynamic	1
0.598817	LST day	Delta monthly	Standard deviation	Fully dynamic	4
0.592284	TMI	-	Minimum	Stationary	N/A
0.575843	LST night	Monthly synoptic	Standard deviation	Month only	3
0.556605	EVI	Delta monthly	Range	Fully dynamic	2
0.551791	LST night	Monthly synoptic	Minimum	Month only	2
0.545351	Land cover	Fraction	N/A	Yearly	N/A
0.542652	TSI	Delta annual	Minimum	Fully dynamic	4
0.541772	LST night	Monthly synoptic	Range	Month only	1
0.539703	TSI	Delta monthly	Maximum	Fully dynamic	2
0.539098	TSI	Monthly synoptic	Minimum	Month only	4
0.538076	TCB	Delta annual	Standard deviation	Fully dynamic	2
0.516498	LST night	Monthly synoptic	Mean	Month only	0
0.50989	LST delta	Monthly synoptic	Maximum	Month only	2
0.508331	Precipitation	-	N/A	Stationary	N/A
0.506875	TSI	Delta monthly	Standard deviation	Fully dynamic	4
0.500968	TCB	Monthly	Minimum	Fully dynamic	1
0.498256	LST night	Delta dynamic	Maximum	Fully dynamic	2
0.497429	LST day	Monthly synoptic	Standard deviation	Month only	1
0.492938	TSI	Monthly synoptic	Standard deviation	Month only	2
0.488327	LST night	Delta monthly	Maximum	Fully dynamic	3
0.486688	LST night	Monthly synoptic	Standard deviation	Month only	0
0.481349	LST night	Delta monthly	Mean	Fully dynamic	4
0.477948	LST night	Delta monthly	Maximum	Fully dynamic	2
0.477431	LST night	Delta annual	Maximum	Fully dynamic	2
0.473925	TSI	Delta monthly	Range	Fully dynamic	3
0.453805	TCB	Delta annual	Range	Fully dynamic	1
0.449195	LST night	Monthly synoptic	Standard deviation	Month only	2
0.444496	LST day	Monthly synoptic	Standard deviation	Month only	3
0.443527	TSI	Delta monthly	Mean	Fully dynamic	1
0.439409	LST day	Delta monthly	Maximum	Fully dynamic	4
0.436116	TCW	Delta annual	Standard deviation	Fully dynamic	0
0.435448	LST day	Delta dynamic	Standard deviation	Fully dynamic	0
0.43489	EVI	Monthly synoptic	Standard deviation	Month only	2
0.430733	EVI	All-years synoptic	Minimum	Stationary	N/A
0.428623	EVI	Monthly synoptic	Standard deviation	Month only	4
0.42674	EVI	Delta dynamic	Minimum	Fully dynamic	4
0.423085	EVI	Delta monthly	Standard deviation	Fully dynamic	0
0.414914	LST night	Monthly synoptic	Mean	Month only	1
0.413319	LST night	Monthly synoptic	Maximum	Month only	4
0.412787	TCW	Delta monthly	Mean	Fully dynamic	4
0.41161	Population density	-	N/A	Yearly	N/A
0.409736	LST night	Delta dynamic	Standard deviation	Fully dynamic	0
0.409118	Elevation	Flow accumulation	Mean	Stationary	N/A
0.407555	TCW	Monthly	Standard deviation	Fully dynamic	3
0.407037	TSI	Monthly synoptic	Maximum	Month only	4
0.403441	EVI	Delta monthly	Minimum	Fully dynamic	2
0.403299	LST day	Delta monthly	Range	Fully dynamic	1
0.399531	EVI	Delta monthly	Standard deviation	Fully dynamic	1
0.397924	Land cover	Adjacencies	N/A	Yearly	N/A
0.39509	LST day	Monthly synoptic	Minimum	Month only	2
0.393675	TCW	Delta monthly	Mean	Fully dynamic	0
0.389332	TSI	Delta monthly	Maximum	Fully dynamic	4
0.387746	PET	-	Standard deviation	Stationary	N/A
0.385198	Nighttime lights	-	Mean	Stationary	N/A
0.379742	EVI	Monthly synoptic	Range	Month only	0
0.379485	LST day	Delta annual	Standard deviation	Fully dynamic	3
0.378746	Proportion urban in cell (GUF)	-	N/A	Stationary	N/A
0.374729	LST night	Monthly synoptic	Range	Month only	1
0.369181	Land cover	Fraction	N/A	Yearly	N/A
0.358003	TCW	Delta annual	Standard deviation	Fully dynamic	3
0.355938	LST night	Delta annual	Range	Fully dynamic	1
0.354972	Population density	-	Minimum	Stationary	N/A
0.349782	LST day	Delta monthly	Minimum	Fully dynamic	3
0.348015	LST day	Delta monthly	Range	Fully dynamic	0
0.34648	EVI	Delta dynamic	Standard deviation	Fully dynamic	1
0.340924	LST day	Monthly synoptic	Standard deviation	Month only	4
0.340634	TCW	Delta monthly	Mean	Fully dynamic	2
0.340004	TSI	Delta monthly	Standard deviation	Fully dynamic	2
0.33894	TCB	Delta monthly	Mean	Fully dynamic	0
0.337111	TCB	Delta monthly	Mean	Fully dynamic	4
0.335315	Precipitation	-	N/A	Stationary	N/A
0.33214	TCW	Delta monthly	Mean	Fully dynamic	3
0.32996	TCB	Delta monthly	Mean	Fully dynamic	4
0.329213	TSI	Monthly synoptic	Minimum	Month only	0
0.324632	LST day	Monthly synoptic	Mean	Month only	3
0.320178	EVI	Delta dynamic	Range	Fully dynamic	0
0.32011	TCB	Monthly	Maximum	Fully dynamic	4
0.319564	TSI	Delta monthly	Maximum	Fully dynamic	3
0.317692	LST night	Delta monthly	Maximum	Fully dynamic	1
0.315837	LST delta	Delta monthly	Mean	Fully dynamic	2
0.311936	TCB	Delta monthly	Mean	Fully dynamic	2
0.311679	TSI	Delta monthly	Minimum	Fully dynamic	2
0.311306	LST delta	All-years synoptic	Maximum	Stationary	N/A
0.310654	LST night	Monthly synoptic	Standard deviation	Month only	4
0.310082	LST night	Delta dynamic	Maximum	Fully dynamic	4
0.307045	EVI	Delta monthly	Mean	Fully dynamic	3
0.295004	LST night	Delta monthly	Range	Fully dynamic	0
0.293381	EVI	Delta monthly	Range	Fully dynamic	3
0.28128	LST night	Delta annual	Standard deviation	Fully dynamic	3
0.280937	LST night	Delta dynamic	Standard deviation	Fully dynamic	4
0.276791	TSI	Monthly	Standard deviation	Fully dynamic	1
0.275818	EVI	Delta dynamic	Range	Fully dynamic	4
0.275307	EVI	Monthly synoptic	Mean	Month only	0
0.2689	LST day	Delta monthly	Standard deviation	Fully dynamic	3
0.267678	Land cover	Fraction	N/A	Yearly	N/A
0.259811	Precipitation	-	N/A	Stationary	N/A
0.256185	LST night	Delta monthly	Standard deviation	Fully dynamic	2
0.252788	TCW	Delta annual	Standard deviation	Fully dynamic	1
0.247407	TCB	Delta annual	Range	Fully dynamic	3
0.246693	TCW	Delta annual	Standard deviation	Fully dynamic	4
0.243986	EVI	Delta monthly	Maximum	Fully dynamic	2
0.241192	TSI	Monthly synoptic	Mean	Month only	1
0.238881	TSI	Delta monthly	Minimum	Fully dynamic	3
0.238459	LST night	Delta annual	Standard deviation	Fully dynamic	2
0.231223	LST day	Monthly synoptic	Range	Month only	4
0.228676	EVI	All-years synoptic	Range	Stationary	N/A
0.226325	LST day	Delta annual	Range	Fully dynamic	4
0.22604	LST day	Monthly synoptic	Range	Month only	0
0.225917	TSI	Delta monthly	Range	Fully dynamic	0
0.223069	LST delta	Delta annual	Maximum	Fully dynamic	2
0.222718	TCW	Delta annual	Standard deviation	Fully dynamic	2
0.22182	Accessibility	-	Range	Stationary	N/A
0.214085	TMI	-	Standard deviation	Stationary	N/A
0.206421	EVI	Delta annual	Standard deviation	Fully dynamic	2
0.206146	Land cover	Fraction	N/A	Yearly	N/A
0.199543	TCW	Delta dynamic	Mean	Fully dynamic	2
0.199191	Land cover	Fraction	N/A	Yearly	N/A
0.19688	LST night	Monthly synoptic	Minimum	Month only	3
0.187859	TSI	Monthly	Standard deviation	Fully dynamic	2
0.170555	EVI	Delta monthly	Mean	Fully dynamic	4
0.16446	LST night	Monthly synoptic	Standard deviation	Month only	4
0.162682	EVI	Delta dynamic	Standard deviation	Fully dynamic	3
0.155706	TSI	Monthly synoptic	Standard deviation	Month only	1
0.144574	Population density	-	Standard deviation	Stationary	N/A
0.112533	Nighttime lights	-	Maximum	Stationary	N/A
0.0688155	Land cover	Fraction	N/A	Yearly	N/A
0.0651672	Land cover	Fraction	N/A	Yearly	N/A
0.064291	Land cover	Majority class	N/A	Yearly	N/A
0.026372	Elevation	Slope angle	Minimum	Stationary	N/A
0.00486305	TCW	Delta annual	Maximum	Fully dynamic	2
0	Any urban in cell (GUF)	-	N/A	Stationary	N/A
0	Significant urban in cell (GUF)	-	N/A	Stationary	N/A
0	Land cover	Adjacencies	N/A	Yearly	N/A
