# Supplementary figures and images for: Quantifying the contribution of Plasmodium falciparum malaria to febrile illness amongst African children
Source: eLife journal article supplement (doi:10.7554/elife.29198), 2017-10-16

# Probability Integral Transform Diagnostic

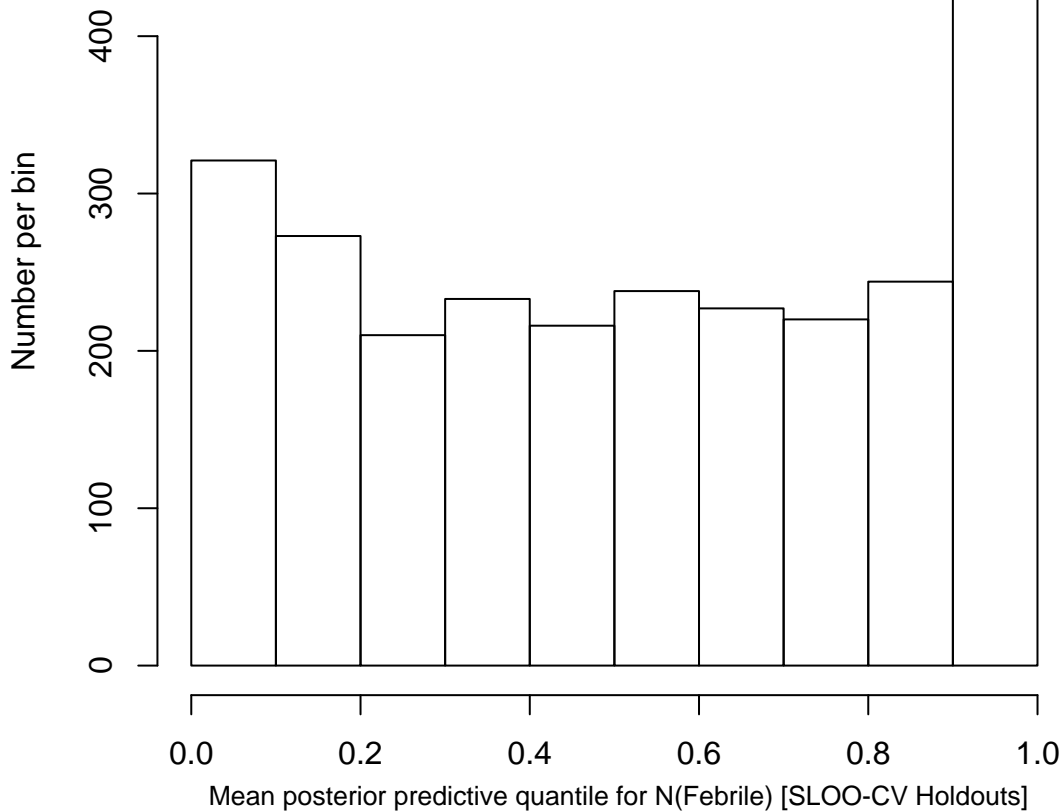

Supplement: supp [file elife-29198-supp-v1.zip › elife_poa_e29198_Figure_1_figure_supplement_1.pdf]
